# Supplementary material
Source: Research Square preprint supplement (doi:10.21203/rs.3.rs-9712673/v1)

**Figure S1. Stromal/BMSC marker support in the purified analytical scaffold.**

Dot plot showing canonical stromal/BMSC markers and representative non-stromal markers across the 10 purified subclusters (C1–C10), supporting stromal/BMSC-enriched identity and marked reduction of immune, endothelial, and erythroid contamination signals.


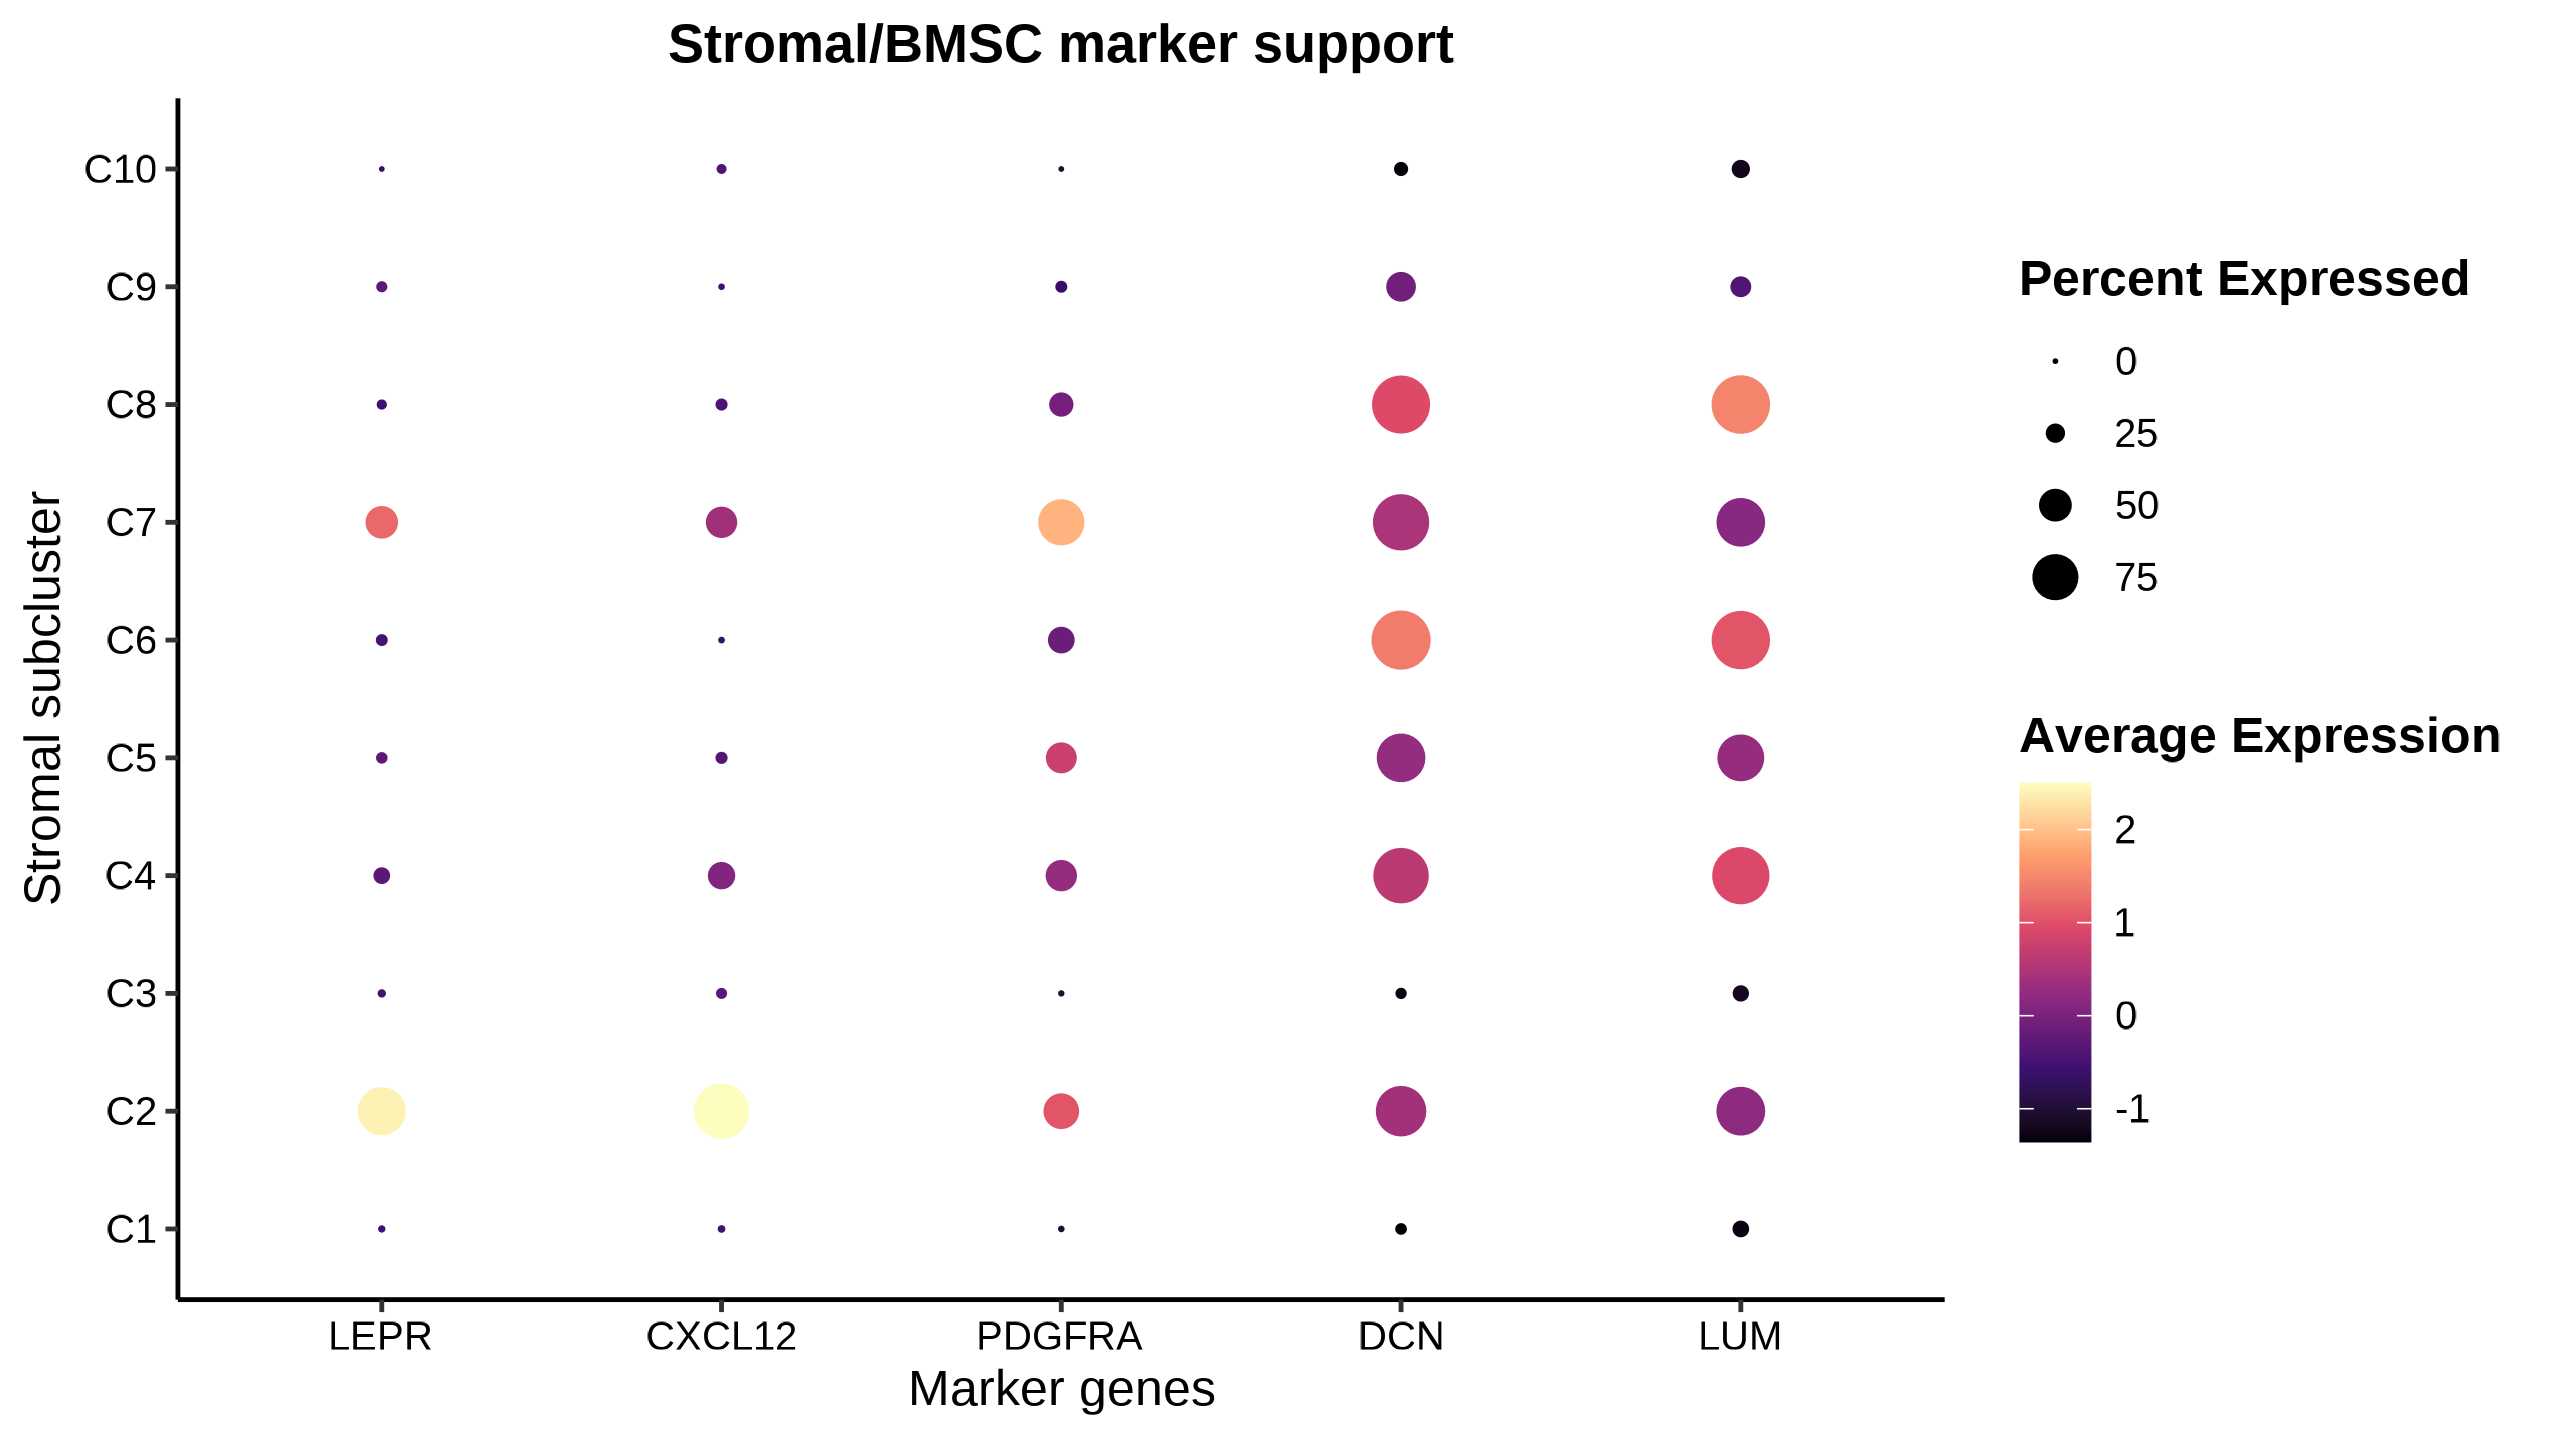


**Figure S2. ubcluster-level heterogeneity of adipogenic and stress-adaptation programs.**

(A) ADIPO score across stromal/BMSC-like subclusters.

(B) De-overlapped hijack-like score across stromal/BMSC-like subclusters.

Violin plots showing the distribution of ADIPO and de-overlapped hijack-like scores across the 10 stromal/BMSC-like subclusters (C1–C10), highlighting state-dependent transcriptional heterogeneity within the purified analytical scaffold.


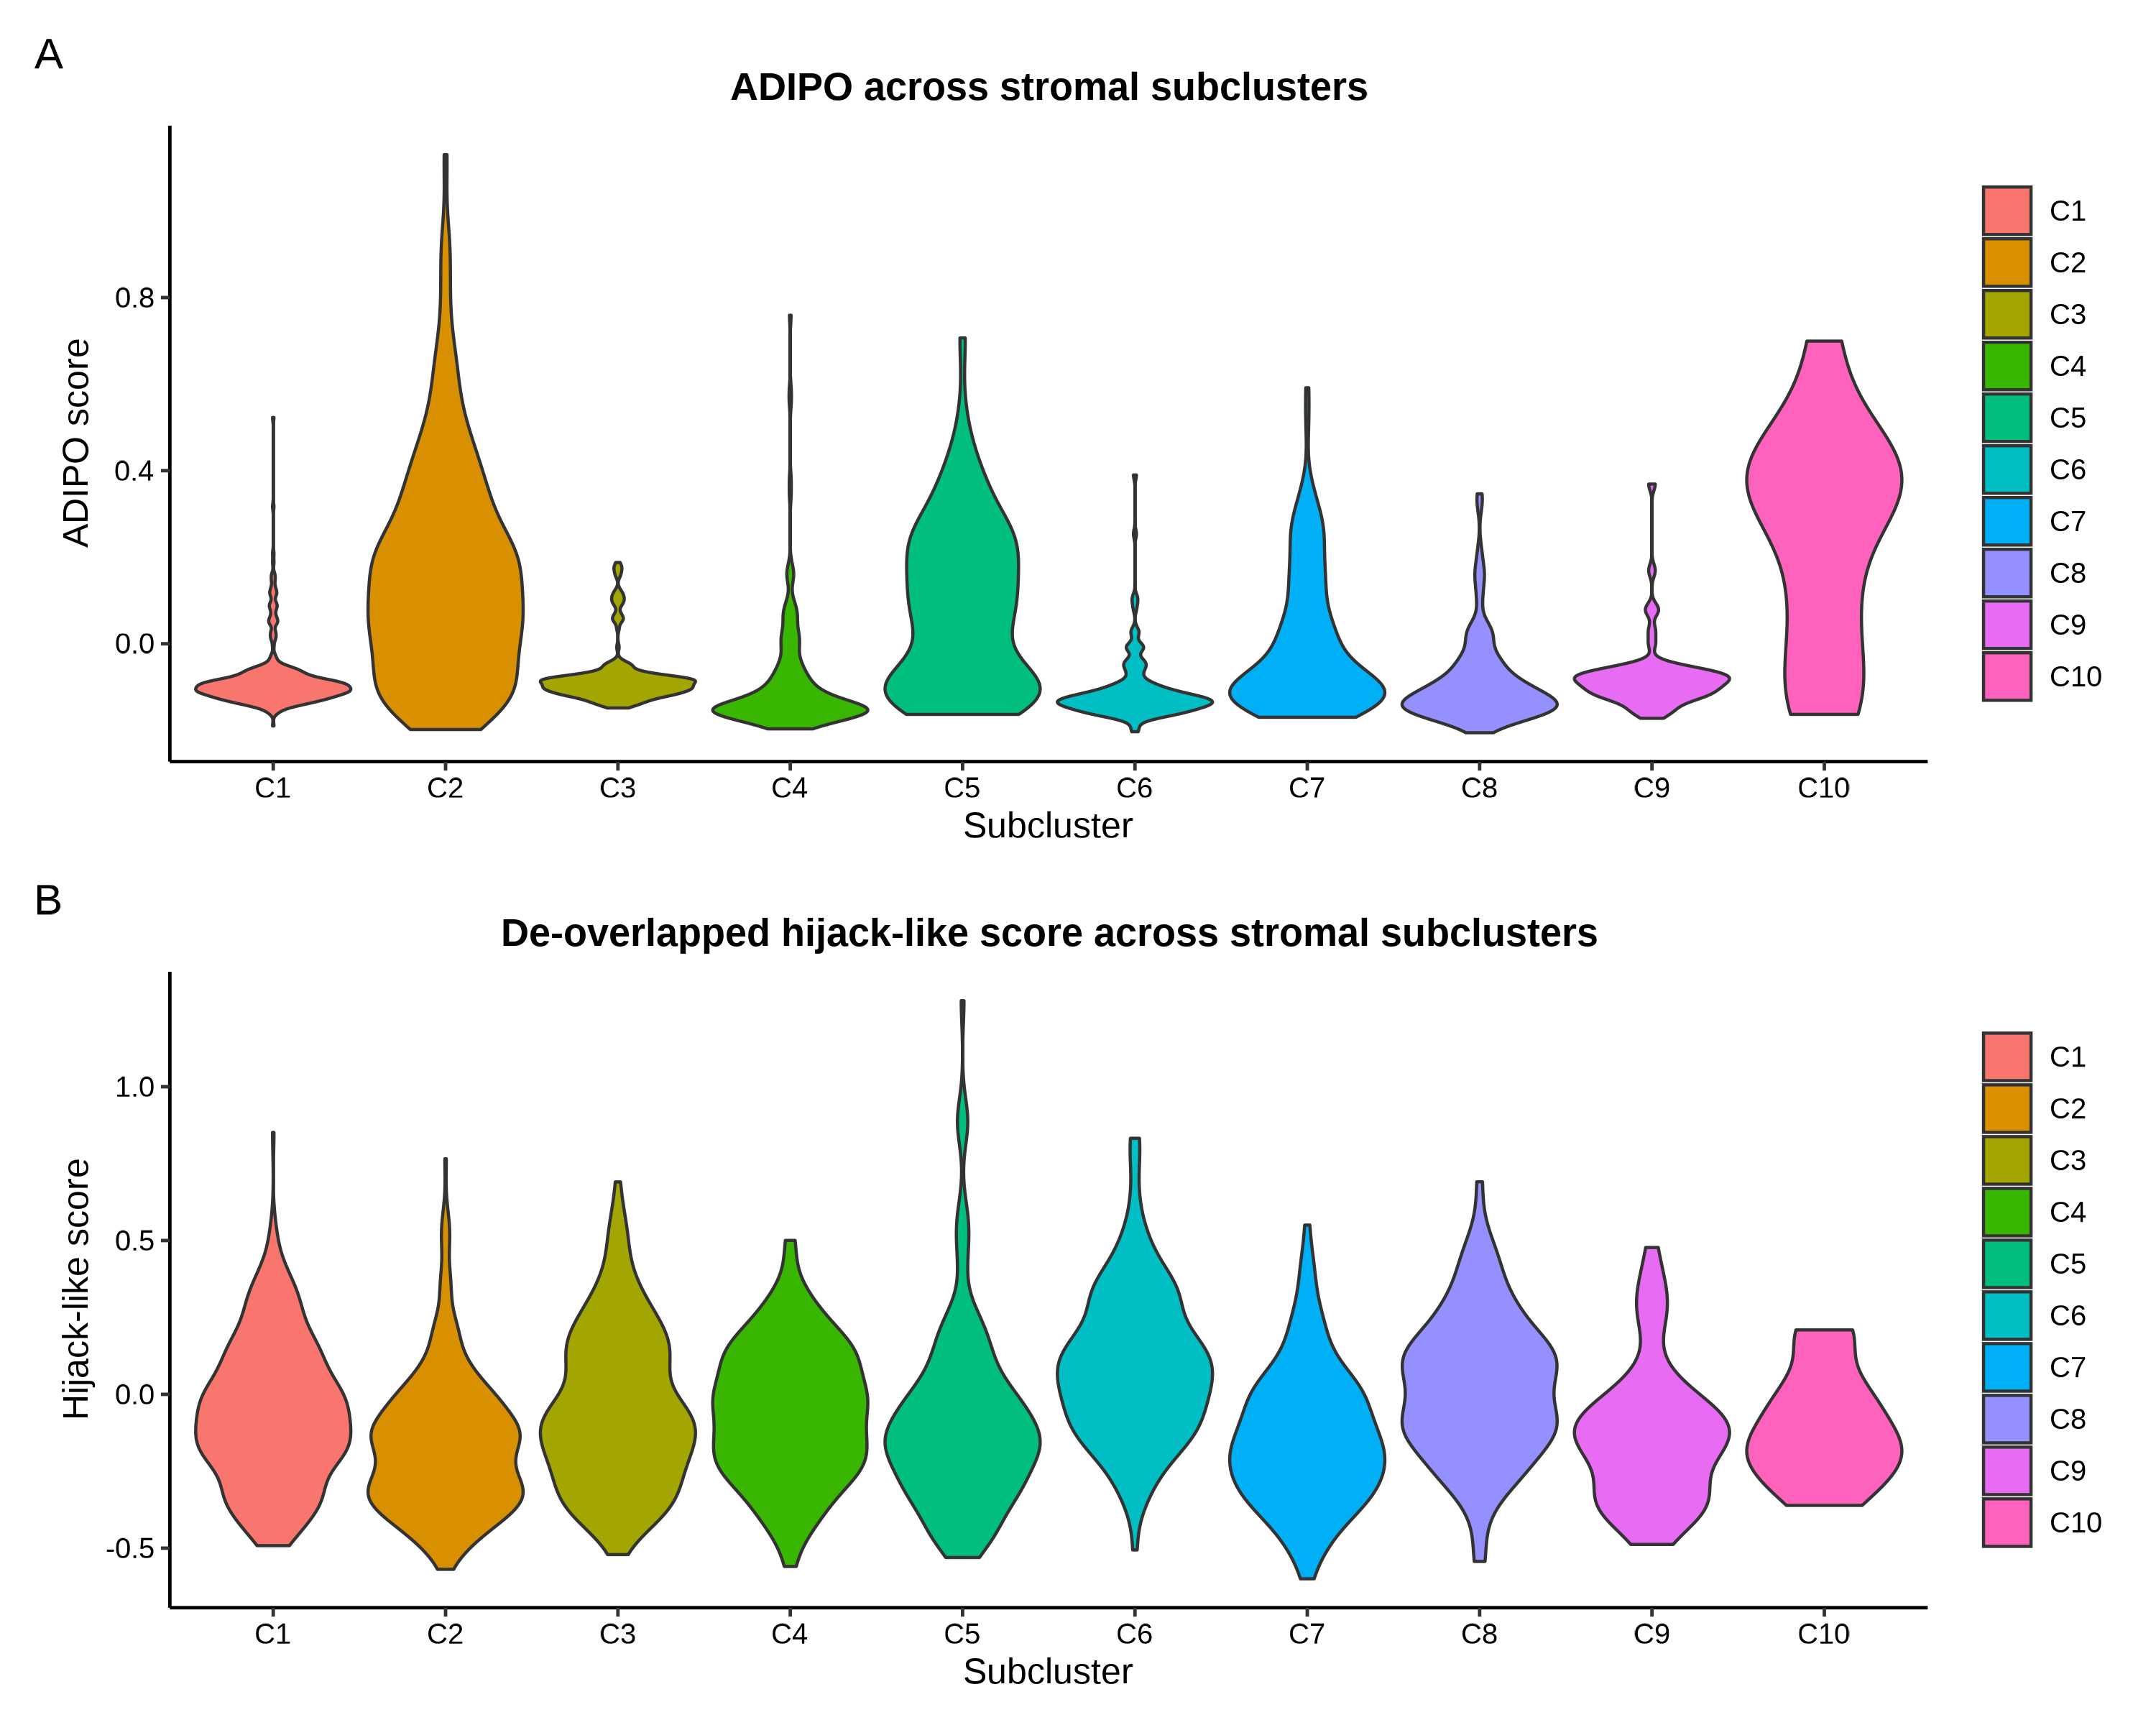


**Figure S3. Robustness of state-axis dynamics across alternative binning resolutions.**
Supplementary analyses evaluating donor/sample-aware score dynamics along the predefined stromal state axis under alternative binning schemes. Across different resolutions, ADIPO consistently increased toward the terminal branch, whereas the hijack-like program plateaued or declined rather than showing terminal reinforcement. These findings support the robustness of terminal decoupling and argue against an explanation based solely on a specific binning choice.

**A.** Axis validation against ADIPO
**B.** Axis validation against de-overlapped hijack-like score
**C.** Raw versus de-overlapped hijack-like trajectories (identical in the present run)
**D.** Sensitivity analysis: 10-bin reinforcement dynamics
**E.** Donor/sample-level reinforcement trajectories


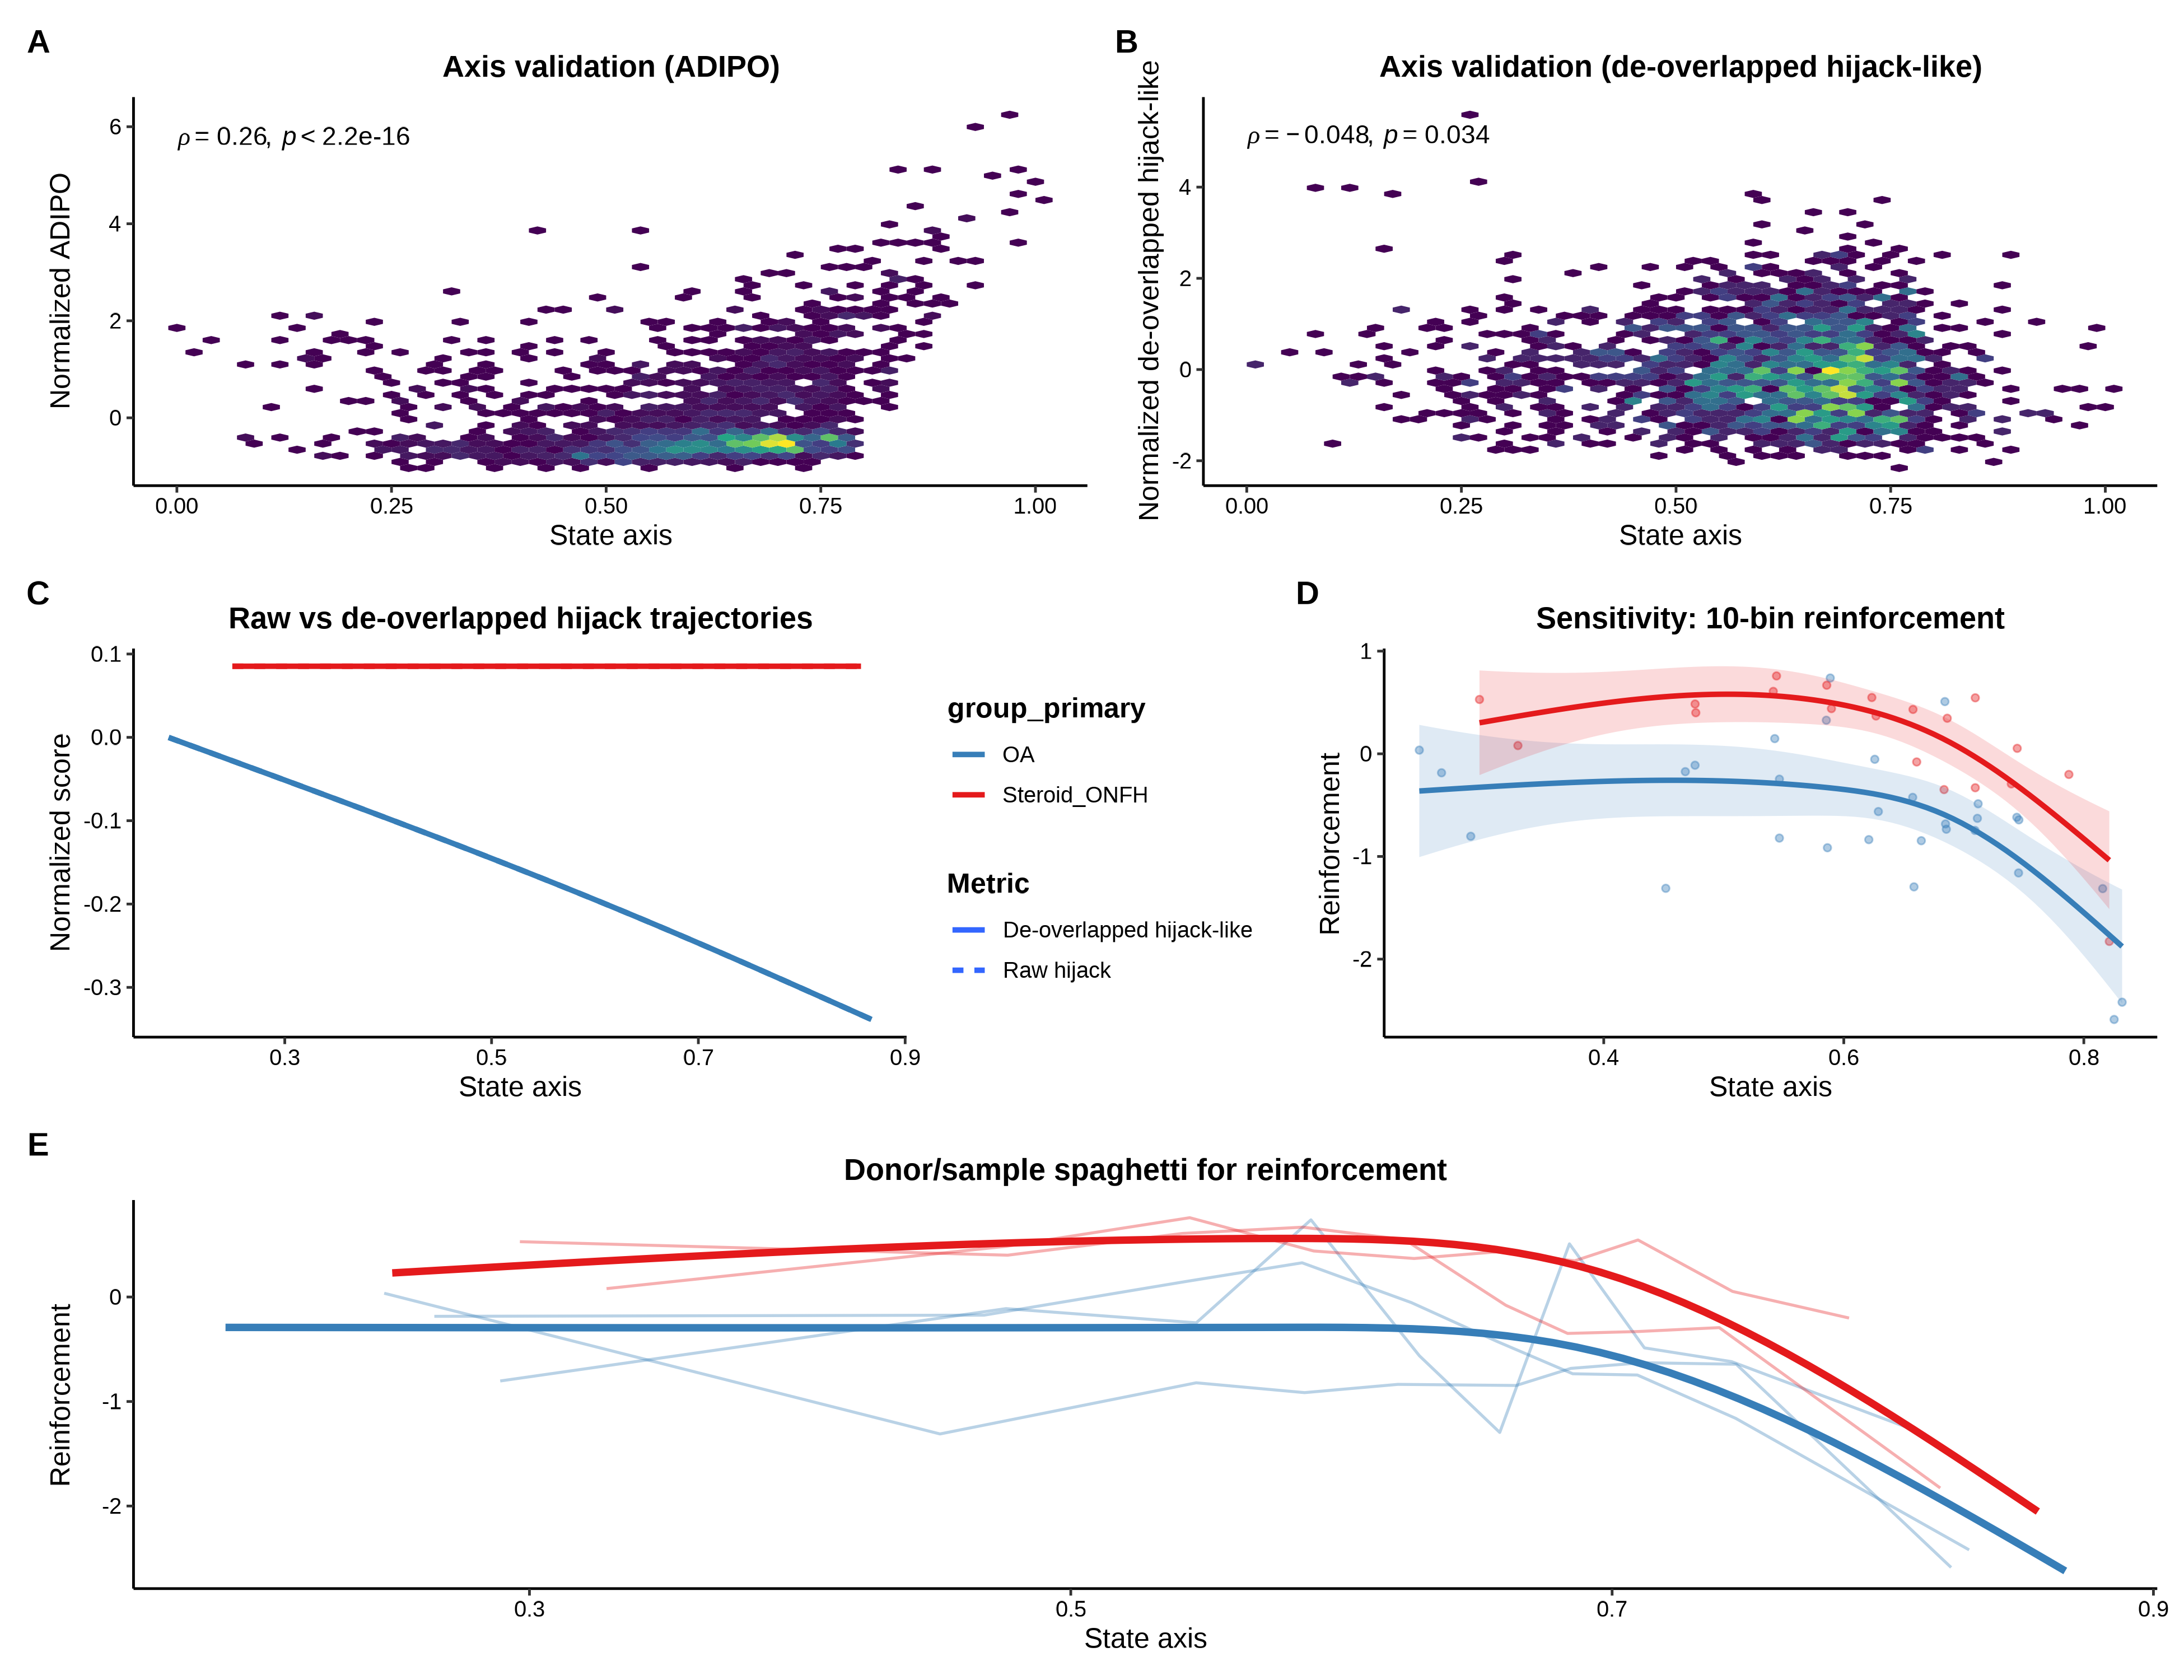


**Figure S4. Supplementary analyses supporting spatial contextualization in the OA-derived femoral-head scaffold.**

**A.** Coupled-program score versus vascular-scaffold score
Spearman rho = 0.022, p = 0.130

**B.** Distance to the vascular-high scaffold
Wilcoxon p = 7.619 × 10^-5

**C.** Threshold sensitivity of coupled-program vascular overlap


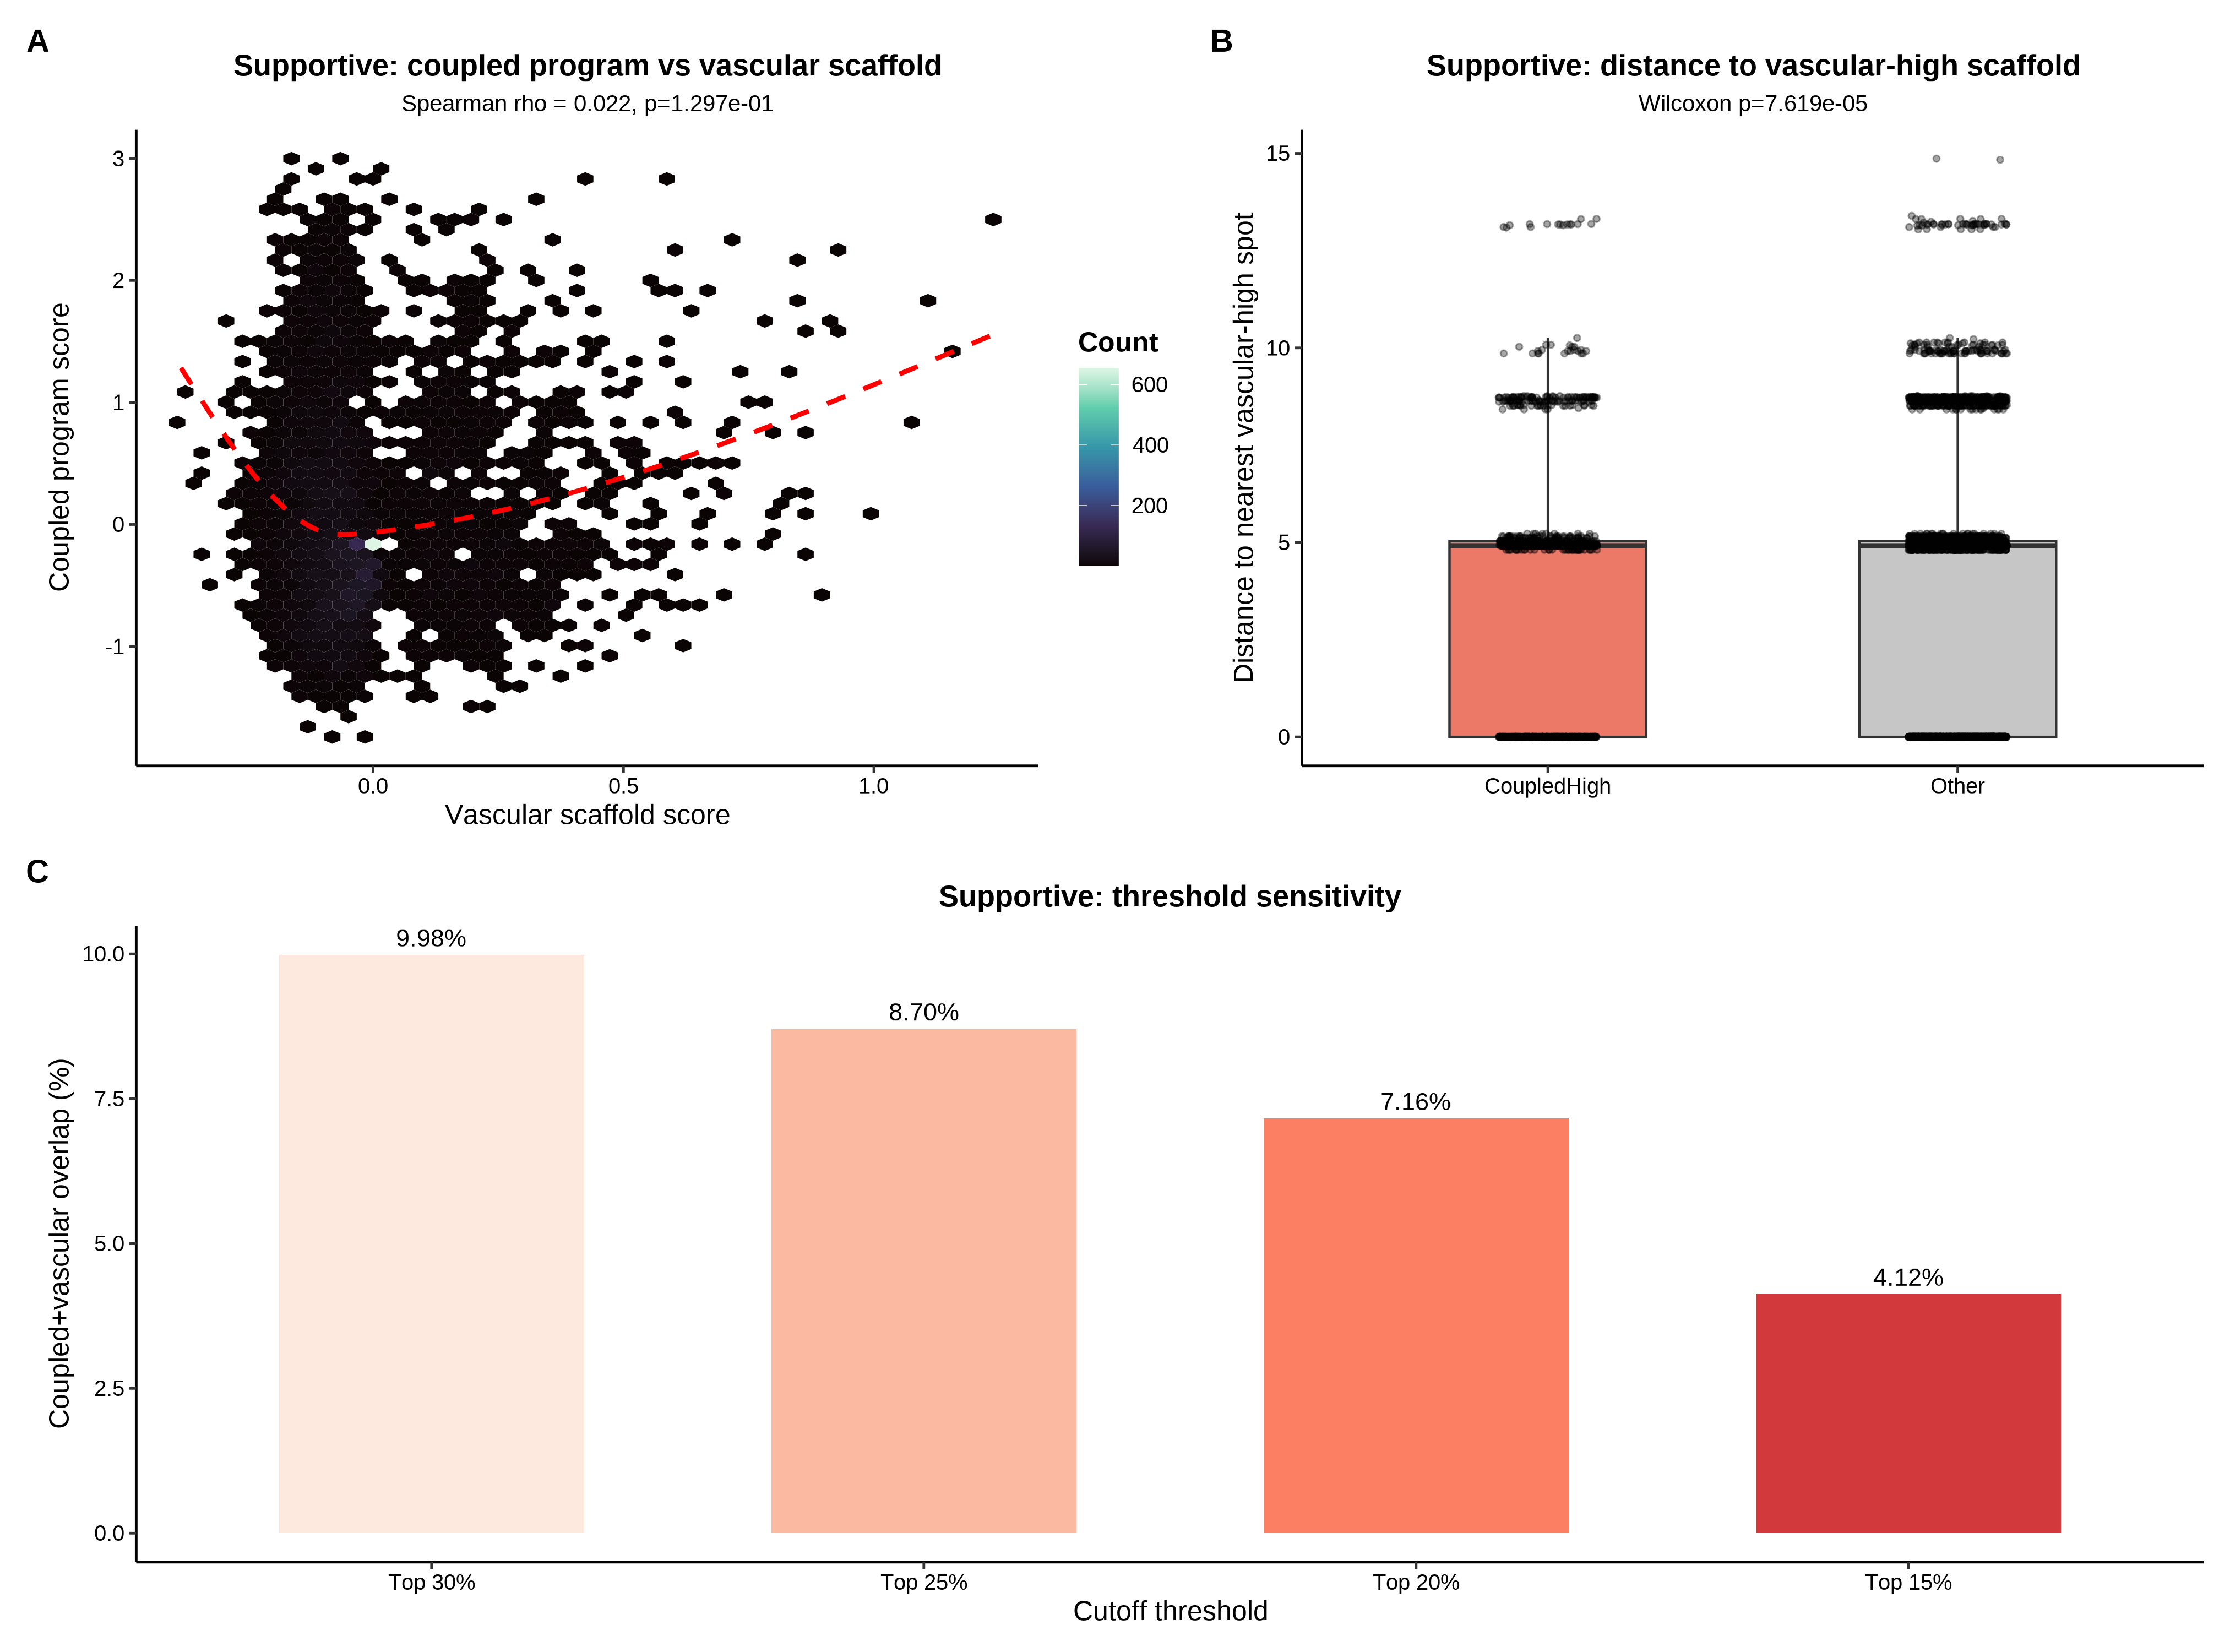


Figure S5. Supplementary analyses supporting lesion-context stromal-class correspondence.

**(A)** Mapping confidence by predicted class.
**(B)** Transferred detailed reference clusters showing supplementary cluster-level correspondence.
**(C)** Stromal compartment-level sample medians showing the association between ADIPO and de-overlapped hijack-like scores (Spearman rho = 0.20, p = 0.800).


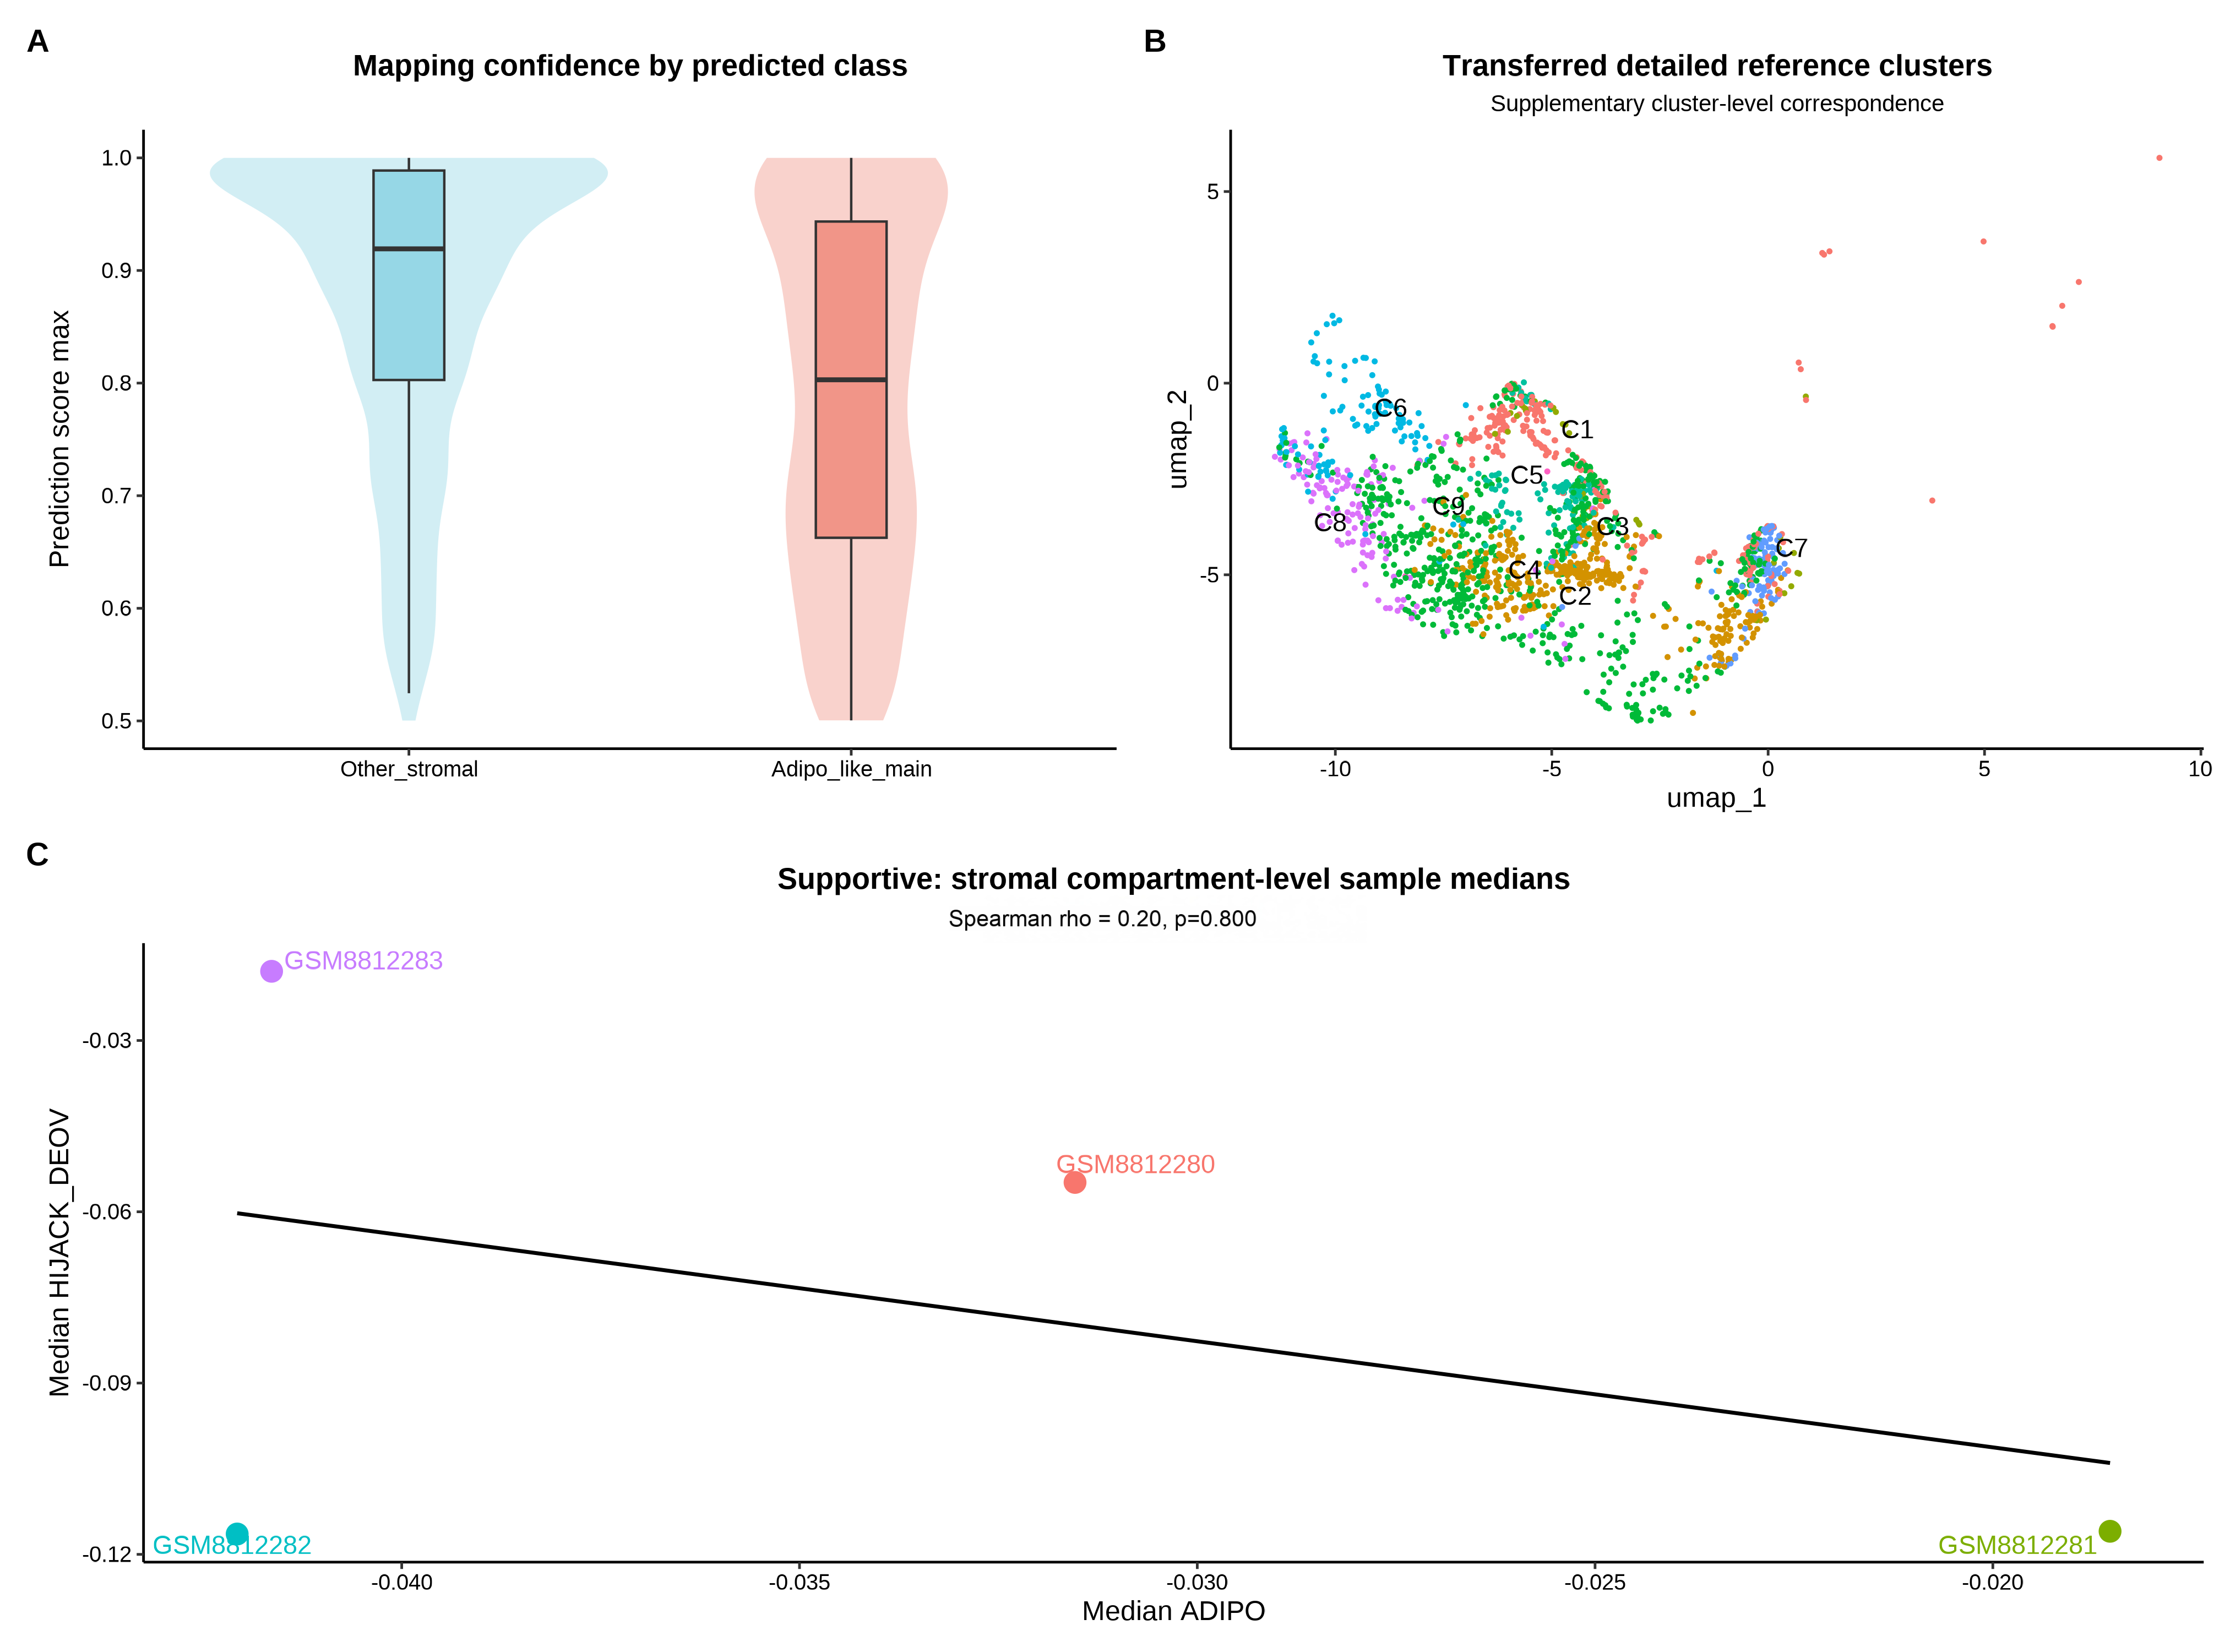


**Figure S6. Detailed docking conformations and pocket topology.**

Extended structural views corresponding to Figure 5A, providing supportive topological context for the predefined interaction pocket.

*
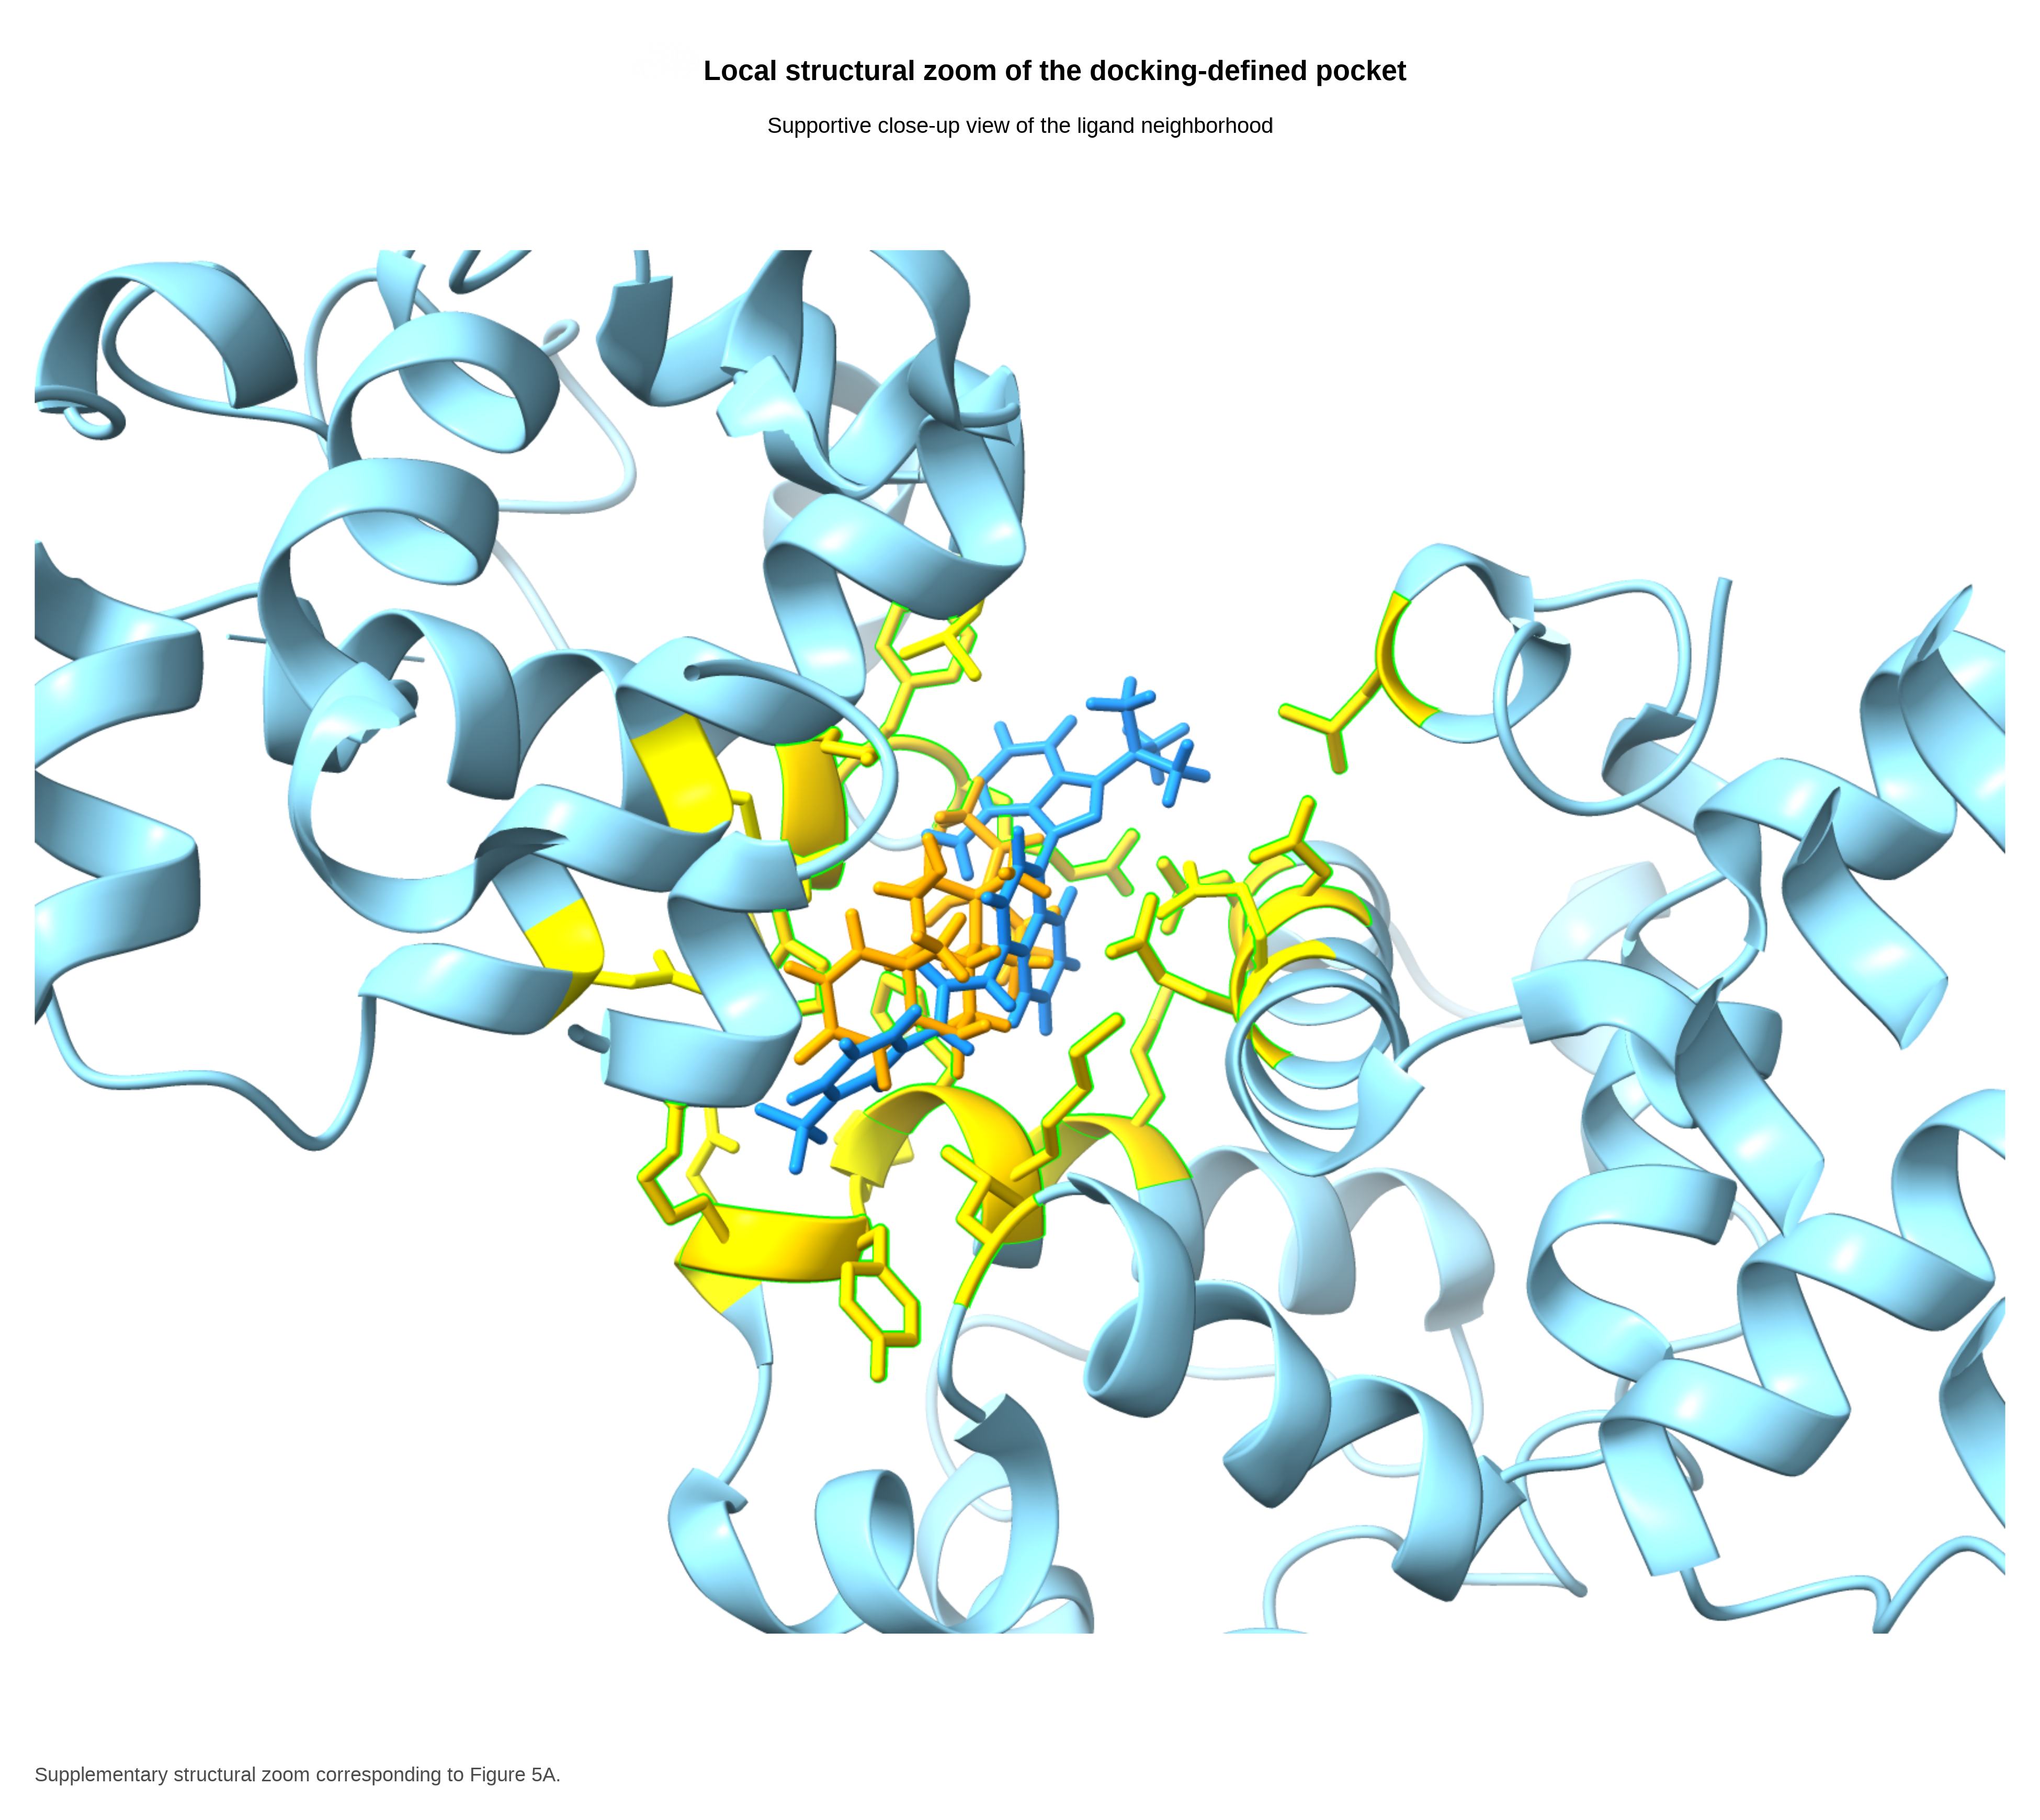
*

**Figure S7. Conventional molecular dynamics trajectory support.** *(补充图 S7. 常规分子动力学轨迹支持。)* Precomputed classical MD trajectory readouts functioning as supplementary support to verify overall conformational stability. *(预计算经典 MD 轨迹读数，作为验证整体构象稳定性的补充支持。)* **(A)** Protein backbone Root Mean Square Deviation (RMSD). *(蛋白质主链均方根偏差 RMSD。)* **(B)** Radius of gyration (Rg) of the protein structure. *(蛋白质结构的回转半径 Rg。)* **(C)** Solvent Accessible Surface Area (SASA) over time. *(随时间变化的溶剂可及表面积 SASA。)* **(D)** Protein-ligand minimum distance demonstrating stable anchoring. *(证明稳定锚定的蛋白质-配体最小距离。)* **(E)** Residue-level Root Mean Square Fluctuation (RMSF) confirming local flexibility without core unfolding. *(残基水平均方根波动 RMSF，证实了局部柔性而无核心去折叠。)*


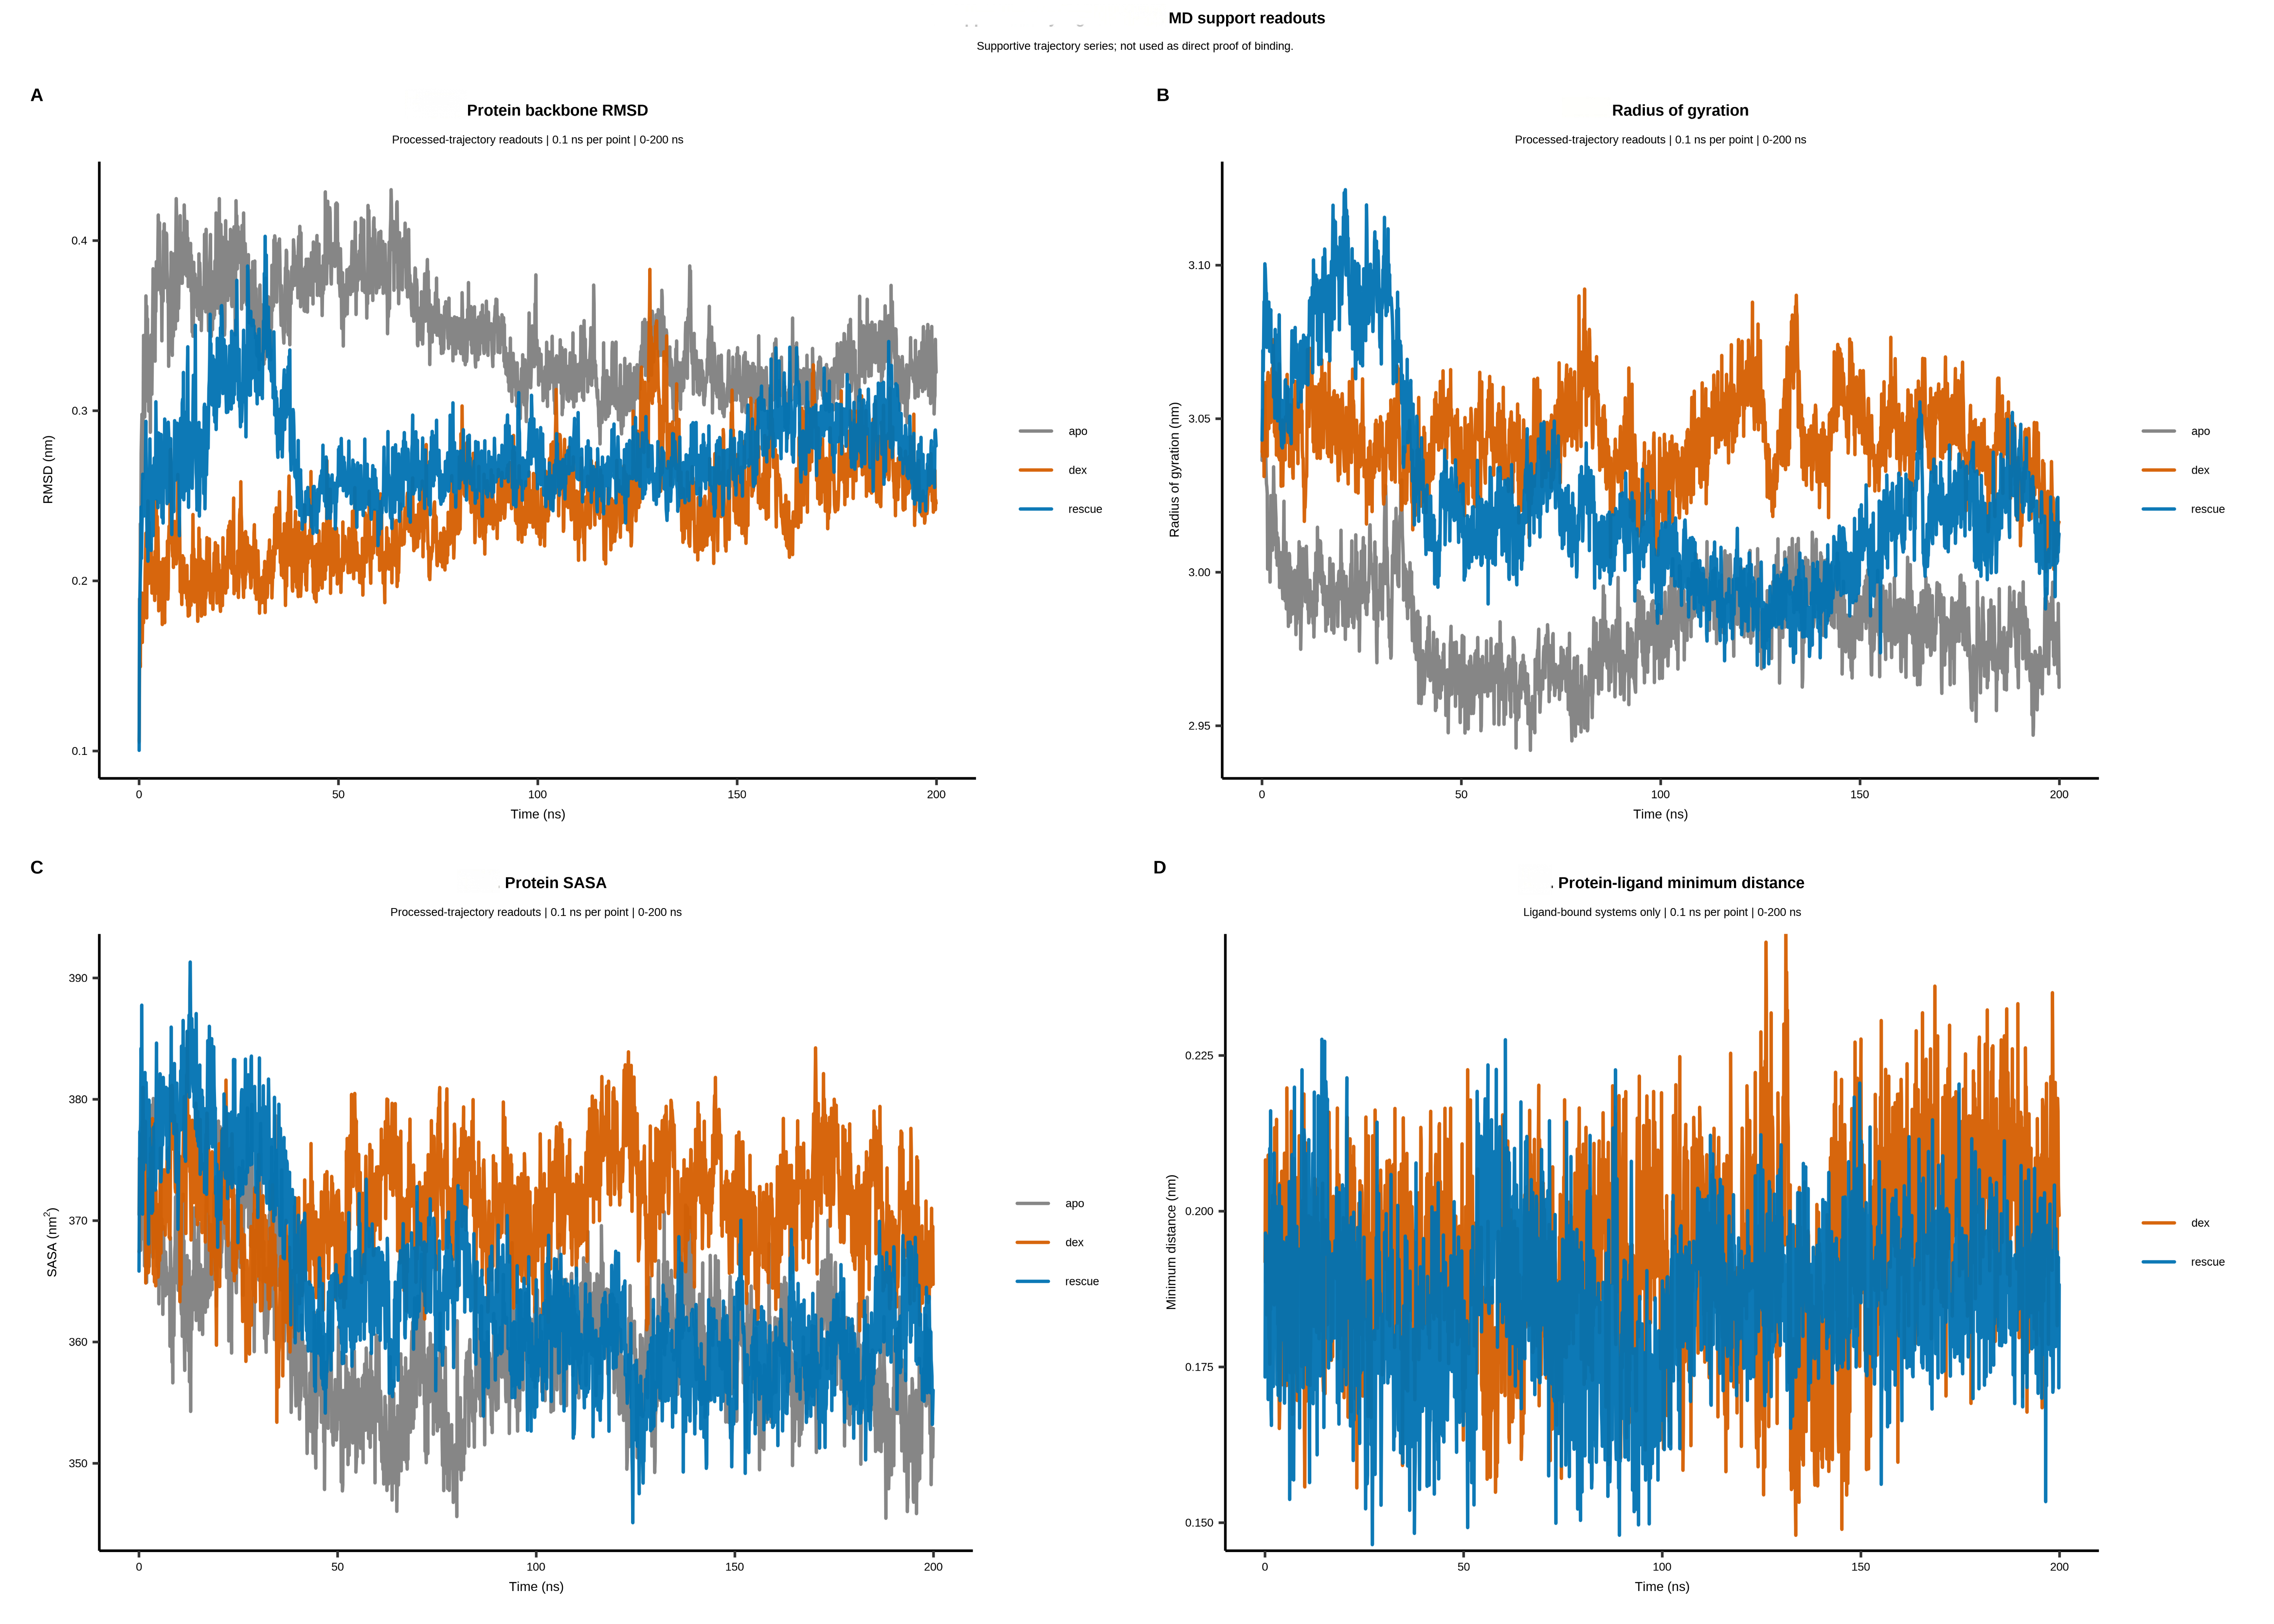


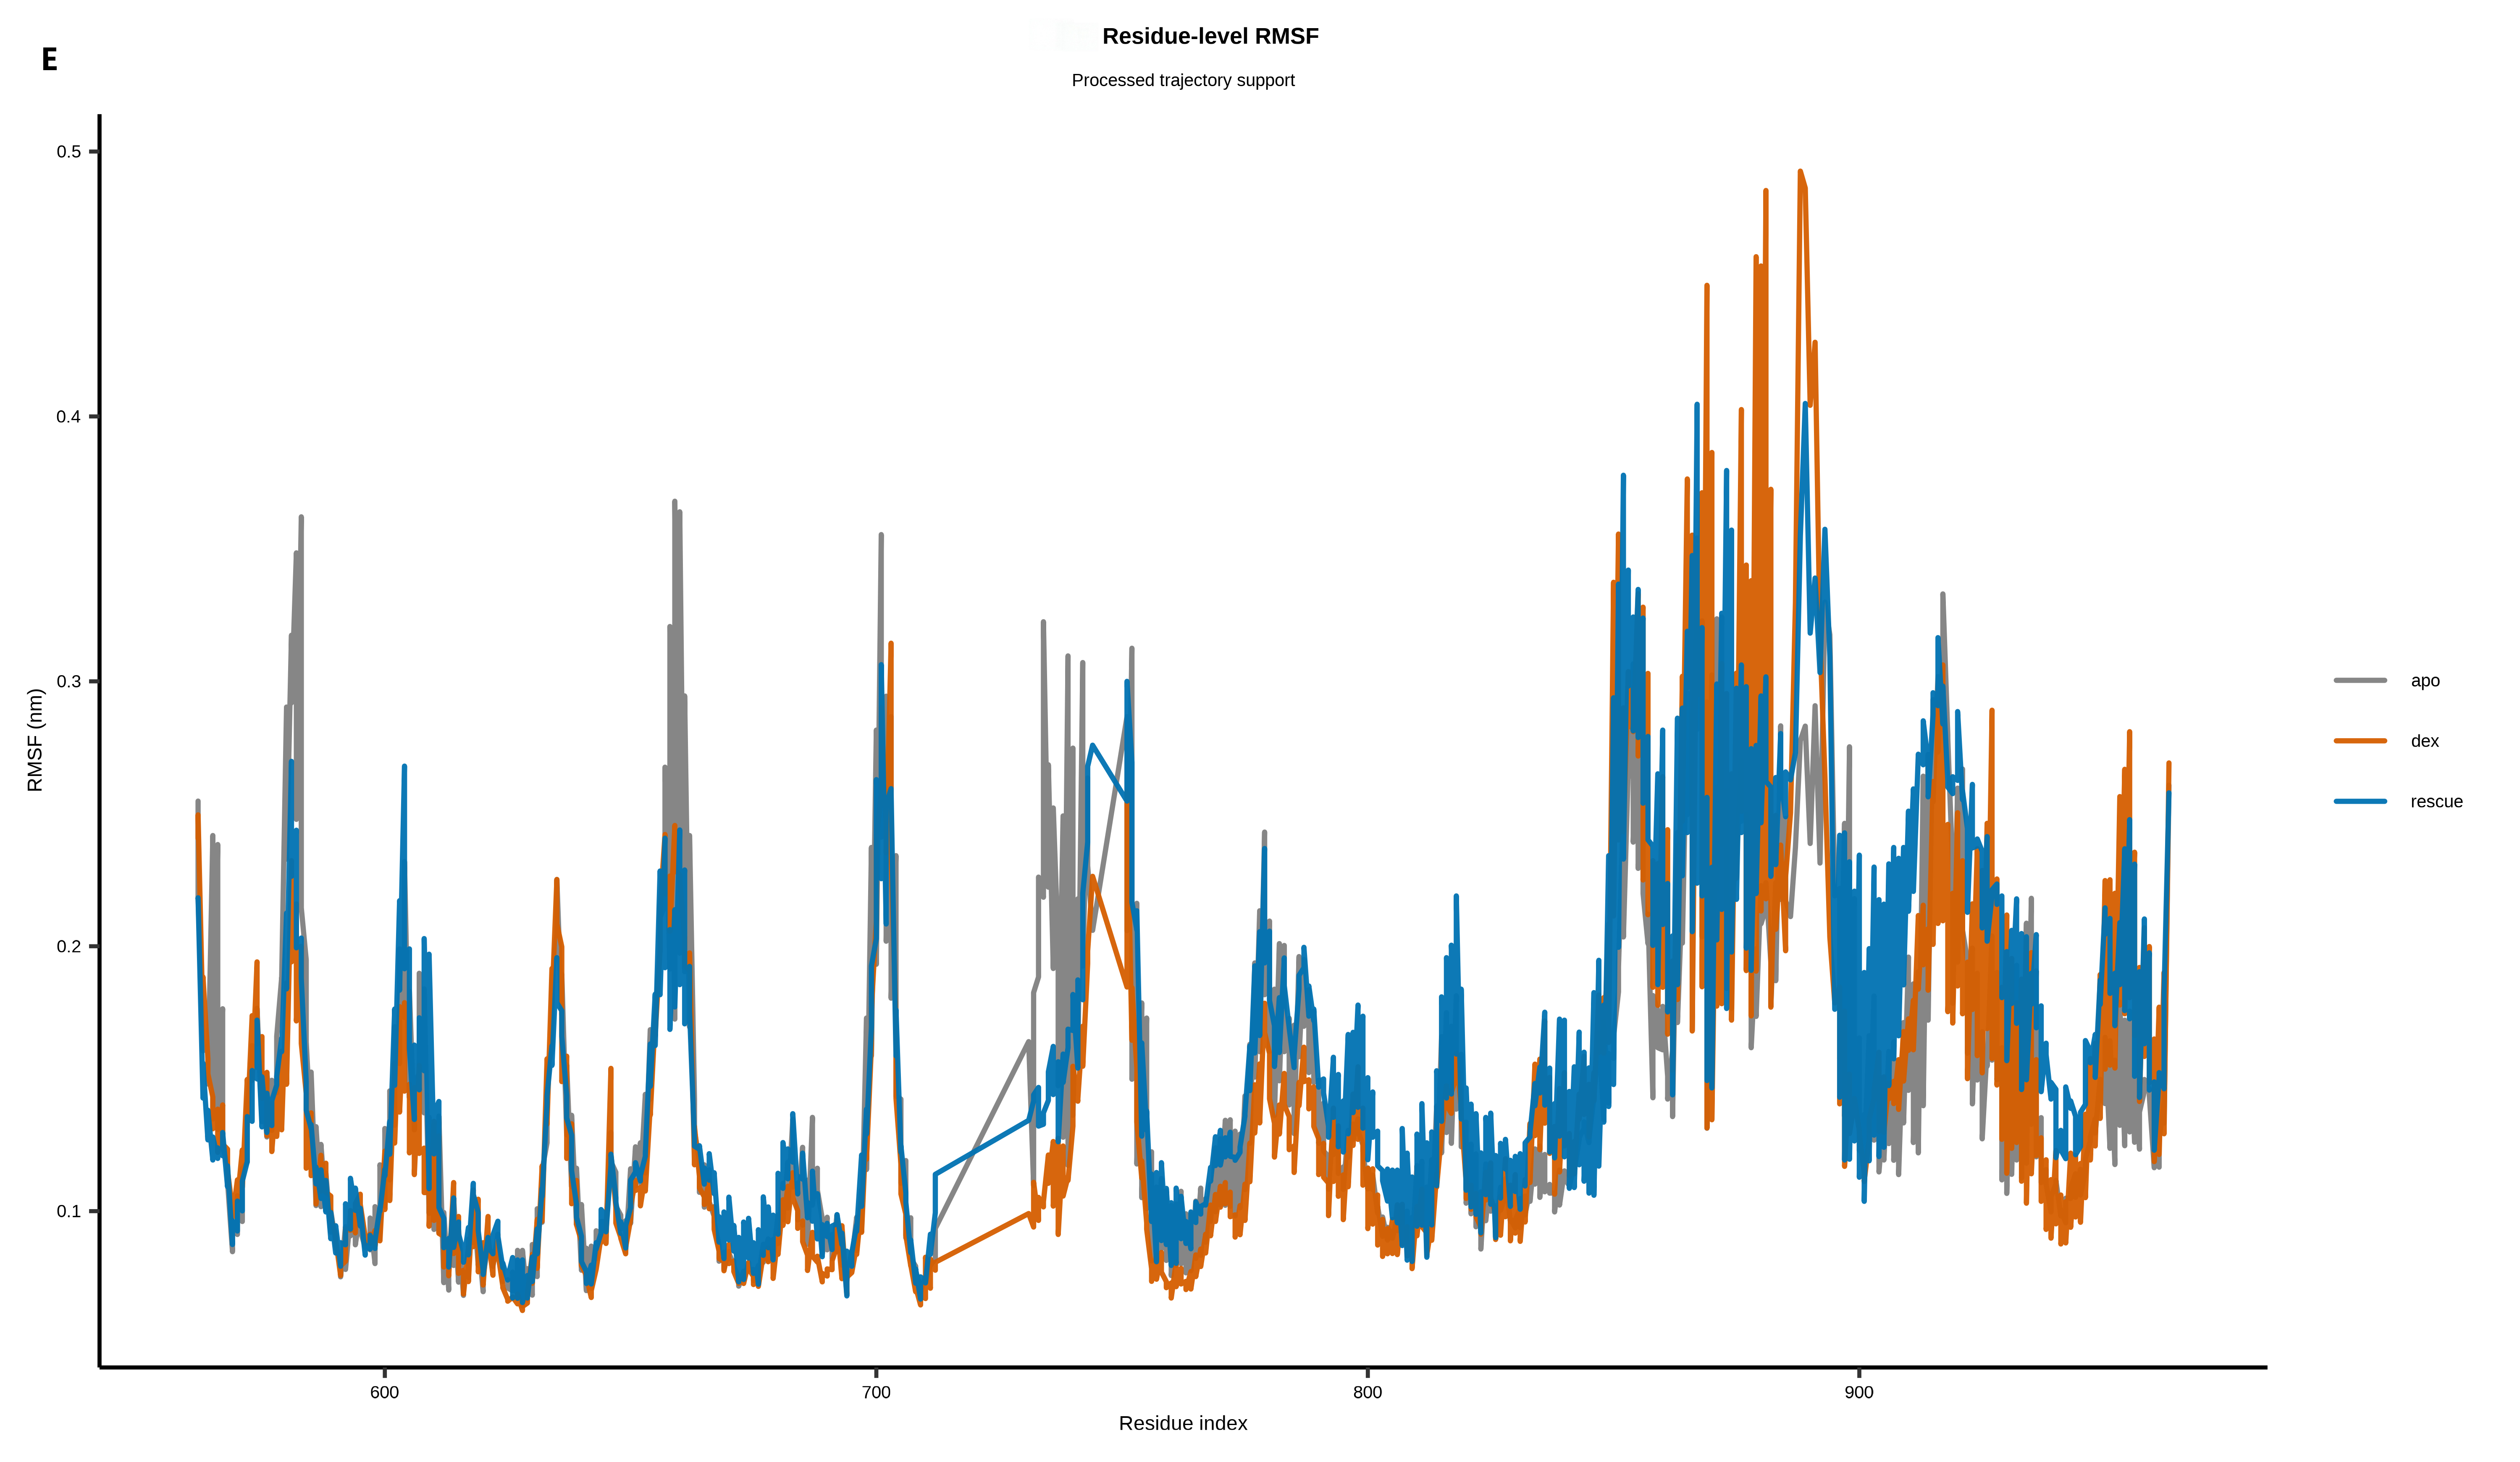

Supplement: Supplementary file 1 [file 0570925fb20850f2b46dbddc.doc]
