# Supplementary material
Source: Research Square preprint supplement (doi:10.21203/rs.3.rs-9712673/v1)
Supplement: Supplementary file 1 [file 285b835eae060ca39cad14ce.xlsx]

## Sheet: Table_Figure1_DonorSummary_Main
donor_label	donor_id	group_primary	n_cells	n_samples	mean_ADIPO	median_ADIPO	mean_HIJACK_RAW	median_HIJACK_RAW	mean_HIJACK_DEOV	median_HIJACK_DEOV
OA__sample1	sample1	OA	114	1	0.00286072007225534	-0.0730024	-0.155292	-0.183876	-0.155292	-0.183876
OA__sample2	sample2	OA	118	1	0.155467073730673	0.138045204773757	-0.0602542	-0.0678269	-0.0602542	-0.0678269
OA__sample3	sample3	OA	383	1	0.0627547104850646	-0.0485564	-0.12891	-0.166792	-0.12891	-0.166792
Steroid_ONFH__sample1	sample1	Steroid_ONFH	1125	1	-0.0598009	-0.0978258	-0.054502	-0.0741116	-0.054502	-0.0741116
Steroid_ONFH__sample2	sample2	Steroid_ONFH	182	1	0.0195819867268111	-0.0829698	-0.0615571	-0.0924553	-0.0615571	-0.0924553

## Sheet: Table_Figure2_DonorZoneSummary
donor_label	donor_id	sample_label	sample_id	group_primary	Zone	Mean_ADIPO_Z	Mean_HIJACK_Z	Mean_Reinf	Median_ADIPO_Z	Median_HIJACK_Z	Median_Reinf	n_cells
OA__sample1	sample1	OA__GSM9463150	GSM9463150	OA	Middle50	-0.0378495	-0.274115	-0.236266	-0.401833	-0.418841	-0.169565	97
OA__sample1	sample1	OA__GSM9463150	GSM9463150	OA	Terminal25	0.7176319054608	-0.608405	-1.32604	0.253904855826992	-0.81626	-0.502083	17
OA__sample2	sample2	OA__GSM9463151	GSM9463151	OA	Early25	0.919856501198092	0.478748095455097	-0.441108	1.39880196670999	0.344099210468638	-0.590717	13
OA__sample2	sample2	OA__GSM9463151	GSM9463151	OA	Middle50	0.654971856124065	0.0111674071530279	-0.643804	0.551794538654843	-0.0997062	-0.510483	85
OA__sample2	sample2	OA__GSM9463151	GSM9463151	OA	Terminal25	1.94440135494249	0.0304553307351611	-1.91395	2.10921665017916	0.0991413982143745	-1.55775	20
OA__sample3	sample3	OA__GSM9463152	GSM9463152	OA	Early25	0.670361366824726	0.347983258114575	-0.322378	0.965961070641787	-0.124372	-1.17007	20
OA__sample3	sample3	OA__GSM9463152	GSM9463152	OA	Middle50	-0.0257862	-0.203822	-0.178036	-0.364218	-0.371467	-0.270437	285
OA__sample3	sample3	OA__GSM9463152	GSM9463152	OA	Terminal25	1.88513599367713	-0.403766	-2.2889	1.84228797483591	-0.485874	-2.2554	78
Steroid_ONFH__sample1	sample1	Steroid_ONFH__GSM9463148	GSM9463148	Steroid_ONFH	Early25	0.360137670369444	-0.190328	-0.550466	0.228219354426048	-0.228309	-0.469932	9
Steroid_ONFH__sample1	sample1	Steroid_ONFH__GSM9463148	GSM9463148	Steroid_ONFH	Middle50	-0.323879	0.0936918112709425	0.417571152539483	-0.489901	0.0155824013802194	0.437441686666689	996
Steroid_ONFH__sample1	sample1	Steroid_ONFH__GSM9463148	GSM9463148	Steroid_ONFH	Terminal25	0.175595849755807	0.0761612561248133	-0.0994346	-0.350959	-0.00551277	0.0386997632067404	120
Steroid_ONFH__sample2	sample2	Steroid_ONFH__GSM9463149	GSM9463149	Steroid_ONFH	Early25	-0.102327	0.117414243954595	0.219741357324908	-0.67034	-0.0171184	0.800431686980211	5
Steroid_ONFH__sample2	sample2	Steroid_ONFH__GSM9463149	GSM9463149	Steroid_ONFH	Middle50	-0.111422	0.101772497749231	0.21319463235856	-0.477617	-0.016709	0.401788916103735	147
Steroid_ONFH__sample2	sample2	Steroid_ONFH__GSM9463149	GSM9463149	Steroid_ONFH	Terminal25	1.56719648061493	-0.150589	-1.71779	1.77343699833716	-0.374625	-1.57866	30

## Sheet: Table_Figure3_SampleClassSummar
GSM_ID	Pred_Class	n_cells	mean_ADIPO	median_ADIPO	mean_HIJACK_DEOV	median_HIJACK_DEOV	mean_HIJACK_RAW	median_HIJACK_RAW	mean_conf
GSM8812280	Other_stromal	353	-0.00949998	-0.0315044	-0.033712	-0.0445514	-0.033712	-0.0445514	0.934151106933492
GSM8812280	Adipo_like_main	61	0.041863826962556	-0.0324003	-0.0840923	-0.100886	-0.0840923	-0.100886	0.845407210391942
GSM8812281	Other_stromal	270	-0.00167516	-0.018572	-0.112235	-0.114281	-0.112235	-0.114281	0.85372073509264
GSM8812281	Adipo_like_main	121	0.00373542835027876	-0.0181009	-0.13483	-0.118227	-0.13483	-0.118227	0.791437767076829
GSM8812282	Other_stromal	241	-0.00386681	-0.0418661	-0.121603	-0.116864	-0.121603	-0.116864	0.912618070419356
GSM8812282	Adipo_like_main	13	0.0252950166155986	-0.0441205	-0.0460894	-0.0641357	-0.0460894	-0.0641357	0.705449878507656
GSM8812283	Other_stromal	487	-0.0140493	-0.042435	-0.00610002	-0.0157649	-0.00610002	-0.0157649	0.828997194763004
GSM8812283	Adipo_like_main	259	0.0269163686087702	-0.0402293	-0.0218371	-0.021311	-0.0218371	-0.021311	0.785200546295309

## Sheet: Table_Figure4_SpatialContextCla
ContextClass	n_spots	pct_spots	mean_AdipoLike_Prob	mean_ADIPO_Pred	mean_HIJACKDEOV_Pred	mean_VascularScore
Background	2608	53.7842854196742	0.195603513628263	-0.0224559	-0.131189	-0.0718271
Vascular_only	1028	21.2002474737059	0.176492082205409	-0.022218	-0.119098	0.132022182080822
Coupled_only	791	16.3126417818107	0.473377293166492	0.061149787289198	-0.0474114	-0.10829
Coupled+Vascular	422	8.70282532480924	0.382425564259813	0.0607010728963278	-0.0442745	0.258491594108291

## Sheet: Table_Figure5_MinDistSupportSum
system	Mean_MinDist	Median_MinDist
dex	0.193822	0.194413
rescue	0.184809	0.184723

## Sheet: Stat01_DonorLevel_GroupC
metric	p_value	statistic	OA_median	SONFH_median	delta_median	OA_mean	SONFH_mean	delta_mean	n_OA	n_SONFH
ADIPO	0.386476230771233	5	0.0627547104850646	-0.0201094	-0.0828641	0.0736941680959975	-0.0201094	-0.0938036	3	2
HIJACK_RAW	0.386476230771233	1	-0.12891	-0.0580296	0.0708803166503117	-0.114819	-0.0580296	0.0567890838361505	3	2
HIJACK_DEOV	0.386476230771233	1	-0.12891	-0.0580296	0.0708803166503117	-0.114819	-0.0580296	0.0567890838361505	3	2

## Sheet: ClusterSummary_ByGroup
bmsc_cluster_clean	group_primary	n_cells	mean_ADIPO	median_ADIPO	mean_HIJACK_RAW	median_HIJACK_RAW	mean_HIJACK_DEOV	median_HIJACK_DEOV
C1	OA	6	-0.00385273	-0.104558	-0.116624	-0.102273	-0.116624	-0.102273
C1	Steroid_ONFH	417	-0.0846029	-0.0993658	-0.0613091	-0.0794448	-0.0613091	-0.0794448
C2	OA	228	0.189952419583371	0.158560196265408	-0.174668	-0.180564	-0.174668	-0.180564
C2	Steroid_ONFH	176	0.118782736019899	0.0807002521827044	-0.159897	-0.189603	-0.159897	-0.189603
C3	OA	2	0.0262891959736143	0.0262891959736143	-0.378512	-0.378512	-0.378512	-0.378512
C3	Steroid_ONFH	234	-0.0776598	-0.0932559	-0.0469593	-0.0804873	-0.0469593	-0.0804873
C4	OA	36	-0.0763121	-0.127312	-0.130682	-0.160629	-0.130682	-0.160629
C4	Steroid_ONFH	177	-0.0958525	-0.141241	-0.0440094	-0.0258702	-0.0440094	-0.0258702
C5	OA	116	0.108527432890637	0.100061748090078	-0.0553675	-0.122551	-0.0553675	-0.122551
C5	Steroid_ONFH	62	0.0467463686948665	0.00373440481740869	-0.16263	-0.160093	-0.16263	-0.160093
C6	OA	23	-0.0681312	-0.106367	0.137959167725693	0.0730849707177393	0.137959167725693	0.0730849707177393
C6	Steroid_ONFH	127	-0.116328	-0.131381	0.0838373842216559	0.0678674691105532	0.0838373842216559	0.0678674691105532
C7	OA	109	-0.00610254	-0.0841807	-0.151762	-0.180149	-0.151762	-0.180149
C7	Steroid_ONFH	24	0.0151653771227067	-0.019701	-0.0837265	-0.0813859	-0.0837265	-0.0813859
C8	OA	41	-0.101398	-0.12201	-0.0104892	-0.0400048	-0.0104892	-0.0400048
C8	Steroid_ONFH	70	-0.0774585	-0.102796	0.044733500286697	0.0400536197808315	0.044733500286697	0.0400536197808315
C9	OA	53	-0.0739914	-0.0902412	-0.154238	-0.157087	-0.154238	-0.157087
C9	Steroid_ONFH	8	-0.0926806	-0.0839363	-0.0174476	0.0192750333823624	-0.0174476	0.0192750333823624
C10	OA	1	-0.16321	-0.16321	0.196280201010528	0.196280201010528	0.196280201010528	0.196280201010528
C10	Steroid_ONFH	12	0.28957083898667	0.364021343172721	-0.131569	-0.16472	-0.131569	-0.16472

## Sheet: ClusterSummary_AllCells
bmsc_cluster_clean	n_cells	mean_ADIPO	mean_HIJACK_DEOV
C10	13	0.254741577268281	-0.10635
C2	404	0.15894780496166	-0.168233
C5	178	0.0870081858112116	-0.0927285
C7	133	-0.00226472	-0.139485
C9	61	-0.0764424	-0.136298
C3	236	-0.0767789	-0.049769
C1	423	-0.0834575	-0.0620938
C8	111	-0.0863011	0.0243359093603467
C4	213	-0.0925499	-0.0586583
C6	150	-0.108938	0.0921360576922749

## Sheet: DonorSummary_MainScores
donor_label	donor_id	group_primary	n_cells	n_samples	mean_ADIPO	median_ADIPO	mean_HIJACK_RAW	median_HIJACK_RAW	mean_HIJACK_DEOV	median_HIJACK_DEOV
OA__sample1	sample1	OA	114	1	0.00286072007225534	-0.0730024	-0.155292	-0.183876	-0.155292	-0.183876
OA__sample2	sample2	OA	118	1	0.155467073730673	0.138045204773757	-0.0602542	-0.0678269	-0.0602542	-0.0678269
OA__sample3	sample3	OA	383	1	0.0627547104850646	-0.0485564	-0.12891	-0.166792	-0.12891	-0.166792
Steroid_ONFH__sample1	sample1	Steroid_ONFH	1125	1	-0.0598009	-0.0978258	-0.054502	-0.0741116	-0.054502	-0.0741116
Steroid_ONFH__sample2	sample2	Steroid_ONFH	182	1	0.0195819867268111	-0.0829698	-0.0615571	-0.0924553	-0.0615571	-0.0924553

## Sheet: SampleSummary_MainScores
sample_label	sample_id	donor_id	group_primary	n_cells	mean_ADIPO	mean_HIJACK_RAW	mean_HIJACK_DEOV
OA__GSM9463150	GSM9463150	sample1	OA	114	0.00286072007225534	-0.155292	-0.155292
OA__GSM9463151	GSM9463151	sample2	OA	118	0.155467073730673	-0.0602542	-0.0602542
OA__GSM9463152	GSM9463152	sample3	OA	383	0.0627547104850646	-0.12891	-0.12891
Steroid_ONFH__GSM9463148	GSM9463148	sample1	Steroid_ONFH	1125	-0.0598009	-0.054502	-0.054502
Steroid_ONFH__GSM9463149	GSM9463149	sample2	Steroid_ONFH	182	0.0195819867268111	-0.0615571	-0.0615571

[truncated: 9 more sheets: DonorZoneSummary, SpatialContextualization_Summar, SampleClassSummary_Main, SampleStromalSummary_Overall, RMSD_Summary, Rg_Summary, SASA_Summary, MinDist_Summary, RMSF_Summary]
